# Supplementary material for: Simultaneous enhancement in stability and efficiency of low-temperature processed perovskite solar cells
Source: Royal Society of Chemistry journal article supplement (doi:10.1039/c6ra14186b), 2016-01-01
Supplement: c6ra14186b1.pdf [file c6ra14186b1.pdf]

## Simultaneous Enhancement in Stability and Efficiency of Low-Temperature Processed Perovskite Solar Cells

### SUPPORTING INFORMATION

**Table S1:** Peak width and estimated dimension of individual crystallite of ZnO and AZO film calculated by the spectral fitting from XRD measurement data

| ETL Layer          | (002) Crystal Orientation |                       | (101) Crystal Orientation |                       |
|--------------------|---------------------------|-----------------------|---------------------------|-----------------------|
|                    | Peak Width (nm)           | Crystallite Size (nm) | Peak Width (nm)           | Crystallite Size (nm) |
| Pristine ZnO       | 0.32827                   | 5.39                  | 0.72964                   | 2.50                  |
| Al doped ZnO (AZO) | 0.40161                   | 4.41                  | 0.82925                   | 2.19                  |

**Table S2:** Average photovoltaic performance of MA<sub>0.6</sub>FA<sub>0.4</sub>PbI<sub>3</sub> perovskite devices having different amounts of Al dopants in ZnO as ETL

| Al dopant (wt%) in ZnO | Open Circuit Voltage, V <sub>OC</sub> (mV) | Short Circuit Current Density, J <sub>SC</sub> (mA/cm <sup>2</sup> ) | Fill Factor, FF (%) | Efficiency (%) | Series Resistance, R <sub>S</sub> (Ω) | Shunt Resistance R <sub>Sh</sub> (Ω) |
|------------------------|--------------------------------------------|----------------------------------------------------------------------|---------------------|----------------|---------------------------------------|--------------------------------------|
| 0                      | 973.48                                     | 21.44                                                                | 56.69               | 11.82          | 10.13                                 | 26190                                |
| 5                      | 992.42                                     | 20.16                                                                | 64.16               | 12.84          | 8.96                                  | 35800                                |
| 10                     | 999.38                                     | 20.34                                                                | 66.28               | 13.48          | 8.42                                  | 25200                                |
| 15                     | 1004.46                                    | 20.18                                                                | 68.89               | 13.95          | 7.05                                  | 35700                                |
| 20                     | 1011.86                                    | 19.77                                                                | 65.52               | 13.11          | 10.53                                 | 39900                                |

**Table S3:** Average photovoltaic performance of different compositional mixed organic cation based  $\text{MA}_x\text{FA}_{1-x}\text{PbI}_3$  perovskite devices having ZnO and Al doped ZnO (AZO) as ETL

| ETL | Mixed Organic Cation Perovskite, $\text{MA}_x\text{FA}_{1-x}\text{PbI}_3$ | Open Circuit Voltage, $V_{OC}$ (mV) | Short Circuit Current Density, $J_{SC}$ ( $\text{mA}/\text{cm}^2$ ) | Fill Factor, FF (%) | Efficiency (%) | Series Resistance, $R_S$ ( $\Omega$ ) | Shunt Resistance $R_{Sh}$ ( $\Omega$ ) |
|-----|---------------------------------------------------------------------------|-------------------------------------|---------------------------------------------------------------------|---------------------|----------------|---------------------------------------|----------------------------------------|
| ZnO | $\text{MAPbI}_3$ (x=1)                                                    | 992.20                              | 19.67                                                               | 51.32               | 10.02          | 8.78                                  | 4140                                   |
|     | $\text{MA}_{0.8}\text{FA}_{0.2}\text{PbI}_3$ (x=0.8)                      | 980.55                              | 21.41                                                               | 53.63               | 11.26          | 18.32                                 | 36600                                  |
|     | $\text{MA}_{0.6}\text{FA}_{0.4}\text{PbI}_3$ (x=0.6)                      | 973.48                              | 21.44                                                               | 56.69               | 11.82          | 10.13                                 | 26190                                  |
|     | $\text{MA}_{0.4}\text{FA}_{0.6}\text{PbI}_3$ (x=0.4)                      | 972.11                              | 21.81                                                               | 52.15               | 11.06          | 12.29                                 | 22800                                  |
|     | $\text{MA}_{0.2}\text{FA}_{0.8}\text{PbI}_3$ (x=0.2)                      | 962.52                              | 21.50                                                               | 50.14               | 10.34          | 18.59                                 | 29000                                  |
|     | $\text{FAPbI}_3$ (x=0)                                                    | 959.18                              | 21.47                                                               | 44.98               | 9.30           | 18.77                                 | 18200                                  |
| AZO | $\text{MAPbI}_3$ (x=1)                                                    | 1020.18                             | 19.37                                                               | 65.93               | 13.03          | 10.04                                 | 41300                                  |
|     | $\text{MA}_{0.8}\text{FA}_{0.2}\text{PbI}_3$ (x=0.8)                      | 1009.63                             | 19.84                                                               | 67.19               | 13.46          | 9.09                                  | 42800                                  |
|     | $\text{MA}_{0.6}\text{FA}_{0.4}\text{PbI}_3$ (x=0.6)                      | 1004.46                             | 20.18                                                               | 68.89               | 13.95          | 7.05                                  | 35700                                  |
|     | $\text{MA}_{0.4}\text{FA}_{0.6}\text{PbI}_3$ (x=0.4)                      | 994.61                              | 20.29                                                               | 64.54               | 13.02          | 8.87                                  | 35000                                  |
|     | $\text{MA}_{0.2}\text{FA}_{0.8}\text{PbI}_3$ (x=0.2)                      | 992.96                              | 20.44                                                               | 58.07               | 11.78          | 12.78                                 | 29000                                  |
|     | $\text{FAPbI}_3$ (x=0)                                                    | 982.38                              | 20.50                                                               | 49.93               | 10.05          | 20.84                                 | 36700                                  |

**Table S4:** PCE,  $J_{SC}$ ,  $V_{OC}$  and FF values of a batch of 10 (ten)  $MA_{0.6}FA_{0.4}PbI_3/ZnO$  perovskite devices demonstrating the excellent reproducibility of the fabricated solar cells

| Serial No. | Open Circuit Voltage, $V_{OC}$ (mV) | Short Circuit Current Density, $J_{SC}$ (mA/cm <sup>2</sup> ) | Fill Factor, FF (%) | Efficiency (%) | Series Resistance, $R_S$ ( $\Omega$ ) | Shunt Resistance $R_{Sh}$ ( $\Omega$ ) |
|------------|-------------------------------------|---------------------------------------------------------------|---------------------|----------------|---------------------------------------|----------------------------------------|
| 1          | 953.818                             | 20.261                                                        | 65.99               | 12.62          | 5.94                                  | 16300                                  |
| 2          | 978.376                             | 21.952                                                        | 54.90               | 11.79          | 10.62                                 | 21200                                  |
| 3          | 988.187                             | 21.899                                                        | 55.16               | 11.94          | 11.02                                 | 35400                                  |
| 4          | 972.261                             | 21.769                                                        | 55.02               | 11.65          | 11.16                                 | 32300                                  |
| 5          | 992.658                             | 21.324                                                        | 52.49               | 11.11          | 12.20                                 | 25000                                  |
| 6          | 953.609                             | 21.427                                                        | 58.39               | 11.81          | 9.14                                  | 20700                                  |
| 7          | 955.887                             | 21.547                                                        | 59.35               | 12.10          | 8.82                                  | 19900                                  |
| 8          | 988.187                             | 21.899                                                        | 55.16               | 11.94          | 11.03                                 | 35400                                  |
| 9          | 978.341                             | 21.871                                                        | 55.85               | 11.95          | 10.17                                 | 23400                                  |
| 10         | 973.509                             | 20.532                                                        | 54.66               | 11.33          | 11.25                                 | 32300                                  |

**Table S5:** PCE,  $J_{SC}$ ,  $V_{OC}$  and FF values of a batch of 10 (ten)  $MA_{0.6}FA_{0.4}PbI_3/AZO$  perovskite devices demonstrating the excellent reproducibility of the fabricated solar cells

| Serial No. | Open Circuit Voltage, $V_{OC}$ (mV) | Short Circuit Current Density, $J_{SC}$ (mA/cm <sup>2</sup> ) | Fill Factor, FF (%) | Efficiency (%) | Series Resistance, $R_S$ ( $\Omega$ ) | Shunt Resistance $R_{Sh}$ ( $\Omega$ ) |
|------------|-------------------------------------|---------------------------------------------------------------|---------------------|----------------|---------------------------------------|----------------------------------------|
| 1          | 995.966                             | 20.822                                                        | 66.65               | 13.61          | 7.83                                  | 26800                                  |
| 2          | 995.31                              | 20.492                                                        | 68.77               | 14.03          | 6.93                                  | 30500                                  |
| 3          | 995.363                             | 20.435                                                        | 67.70               | 13.77          | 8.51                                  | 37200                                  |
| 4          | 989.371                             | 20.263                                                        | 67.91               | 13.71          | 6.39                                  | 24400                                  |
| 5          | 1012.987                            | 19.708                                                        | 71.34               | 14.24          | 5.94                                  | 37300                                  |
| 6          | 1012.505                            | 20.062                                                        | 67.72               | 13.76          | 7.65                                  | 41200                                  |
| 7          | 1013.157                            | 20.005                                                        | 70.91               | 14.37          | 5.94                                  | 35000                                  |
| 8          | 1005.857                            | 19.775                                                        | 70.99               | 14.12          | 5.985                                 | 37800                                  |
| 9          | 1015                                | 20.413                                                        | 67.83               | 14.05          | 8.19                                  | 42400                                  |
| 10         | 1009.113                            | 19.854                                                        | 69.16               | 13.86          | 7.20                                  | 44400                                  |

**Table S6:** Fitted values of recombination resistance as a function of applied bias from Nyquist plot in case of  $MA_{0.6}FA_{0.4}PbI_3/ZnO$  and  $MA_{0.6}FA_{0.4}PbI_3/AZO$  perovskite devices under dark

| Bias (V) | $MA_{0.6}FA_{0.4}PbI_3/ZnO$ Device | $MA_{0.6}FA_{0.4}PbI_3/AZO$ Device |
|----------|------------------------------------|------------------------------------|
| 0.4      | 74638                              | 88500                              |
| 0.5      | 46420                              | 57800                              |
| 0.6      | 20100                              | 28500                              |
| 0.7      | 6220                               | 9750                               |
| 0.8      | 3470                               | 6970                               |
| 0.9      | 1820                               | 3872                               |

**Table S7:** Fitted values of recombination resistance as a function of applied bias from Nyquist plot in case of  $MA_{0.6}FA_{0.4}PbI_3/ZnO$  and  $MA_{0.6}FA_{0.4}PbI_3/AZO$  perovskite devices under illumination

| Bias (V) | $MA_{0.6}FA_{0.4}PbI_3/ZnO$ Device | $MA_{0.6}FA_{0.4}PbI_3/AZO$ Device |
|----------|------------------------------------|------------------------------------|
| 0.4      | 7720                               | 12300                              |
| 0.5      | 4992                               | 8750                               |
| 0.6      | 3030                               | 6100                               |
| 0.7      | 2264                               | 4970                               |
| 0.8      | 1466                               | 3360                               |
| 0.9      | 1110                               | 2770                               |

**Table S8:** Dark carrier mobility for MA<sub>0.6</sub>FA<sub>0.4</sub>PbI<sub>3</sub>/ZnO devices extracted from Nyquist plot under dark

| Bias Voltage (V) | Admittance, Y (μMho) from CPE | Heterogeneity factor, N from CPE | Contact Resistance, R <sub>C</sub> (Ω) | Mobility, μ (cm <sup>2</sup> V <sup>-1</sup> s <sup>-1</sup> ) |
|------------------|-------------------------------|----------------------------------|----------------------------------------|----------------------------------------------------------------|
| 0.4              | 0.09                          | 0.95                             | 118                                    | 2.13                                                           |
| 0.5              | 0.15                          | 0.94                             | 105                                    | 1.62                                                           |
| 0.6              | 0.16                          | 0.97                             | 95                                     | 1.21                                                           |
| 0.7              | 0.25                          | 0.96                             | 80                                     | 1.07                                                           |
| 0.8              | 0.26                          | 0.98                             | 78                                     | 0.82                                                           |
| 0.9              | 0.37                          | 0.96                             | 75                                     | 0.79                                                           |

**Table S9:** Dark carrier mobility for MA<sub>0.6</sub>FA<sub>0.4</sub>PbI<sub>3</sub>/AZO devices extracted from Nyquist plot under dark

| Bias Voltage (V) | Admittance, Y (μMho) from CPE | Heterogeneity factor, N from CPE | Contact Resistance, R <sub>C</sub> (Ω) | Mobility, μ (cm <sup>2</sup> V <sup>-1</sup> s <sup>-1</sup> ) |
|------------------|-------------------------------|----------------------------------|----------------------------------------|----------------------------------------------------------------|
| 0.4              | 0.07                          | 0.96                             | 114                                    | 2.61                                                           |
| 0.5              | 0.10                          | 0.96                             | 107                                    | 1.89                                                           |
| 0.6              | 0.14                          | 0.95                             | 97                                     | 1.72                                                           |
| 0.7              | 0.21                          | 0.95                             | 93                                     | 1.24                                                           |
| 0.8              | 0.25                          | 0.96                             | 87                                     | 0.98                                                           |
| 0.9              | 0.33                          | 0.96                             | 80                                     | 0.82                                                           |

**Dark Carrier Mobility Calculation:**

Dark carrier mobility was calculated from the fitted electronic parameters from Nyquist plot. The dark carrier mobility can be expressed as:

$$\text{Mobility, } \mu = \frac{\tau_t q l^2}{kT} \quad [1]$$

where,  $\tau_t$ ,  $q$ ,  $l$ ,  $k$  and  $T$  denote transit time, elementary charge, perovskite layer thickness, Boltzman's constant and absolute temperature respectively.

Transit time,  $\tau_t$  can be defined as:

$$\text{Transit time, } \tau_t = R_c C_\mu \quad [1]$$

Where,  $R_c$  and  $C_\mu$  denote contact resistance and chemical capacitance respectively.  $C_\mu$  can be found by the conversion of constant phase element (CPE) into capacitance using the following formula:

$$C_\mu = (R_{\text{rec}})^{\frac{1-N}{N}} (Q)^{\frac{1}{N}} \quad [2]$$

$$Q = \frac{Y}{2\pi f}$$

where,  $C_{\mu}$ ,  $Q$ ,  $N$ ,  $Y$  and  $f$  denote converted capacitance from constant phase element (CPE), pseudo capacitance from CPE, ideality factor from CPE, admittance from CPE and source frequency for impedance analyzer respectively.

**Table S10:** Flat-band potential, acceptor density and depletion layer width at zero bias of  $MA_{0.6}FA_{0.4}PbI_3/ZnO$  and  $MA_{0.6}FA_{0.4}PbI_3/AZO$  perovskite devices extracted from Mott-Schottky curve

| ETL Layer          | Dopant Density ( $cm^{-3}$ ) | Flat-band Potential (V) | Depletion Layer Width (nm) |
|--------------------|------------------------------|-------------------------|----------------------------|
| Pristine ZnO       | $2.0 \times 10^{16}$         | 0.96                    | 335.46                     |
| Al doped ZnO (AZO) | $6.2 \times 10^{16}$         | 1.13                    | 206.80                     |

**Table S11:** PCE,  $J_{SC}$ ,  $V_{OC}$  and FF values of  $MA_{0.6}FA_{0.4}PbI_3/ZnO$  and  $MA_{0.6}FA_{0.4}PbI_3/AZO$  perovskite devices at two different scan rates demonstrating the hysteresis phenomena in the corresponding devices

| ETL Layer          | Scan rate (V/s) | Open Circuit Voltage, $V_{OC}$ (mV) | Short Circuit Current Density, $J_{SC}$ ( $mA/cm^2$ ) | Fill Factor, FF (%) | Efficiency (%) | Series Resistance, $R_S$ ( $\Omega$ ) | Shunt Resistance $R_{Sh}$ ( $\Omega$ ) |
|--------------------|-----------------|-------------------------------------|-------------------------------------------------------|---------------------|----------------|---------------------------------------|----------------------------------------|
| Pristine ZnO       | 0.1             | 977.884                             | 22.157                                                | 58.08               | 12.35          | 9.59                                  | 30200                                  |
|                    | 1.0             | 978.341                             | 21.871                                                | 55.85               | 12.00          | 10.20                                 | 23400                                  |
| Al doped ZnO (AZO) | 0.1             | 1013.157                            | 20.005                                                | 70.91               | 14.37          | 5.94                                  | 35000                                  |
|                    | 1.0             | 1012.755                            | 20.158                                                | 69.81               | 14.25          | 6.80                                  | 35900                                  |

**Table S12:** Day wise PCE,  $J_{SC}$ ,  $V_{OC}$  and FF values of  $MA_{0.6}FA_{0.4}PbI_3/ZnO$  devices stored in a  $N_2$  filled glovebox for 30 days

| No. of Days | Open Circuit Voltage, $V_{OC}$ (mV) | Short Circuit Current Density, $J_{SC}$ (mA/cm <sup>2</sup> ) | Fill Factor, FF (%) | Efficiency (%) | Series Resistance, $R_S$ ( $\Omega$ ) | Shunt Resistance $R_{Sh}$ ( $\Omega$ ) |
|-------------|-------------------------------------|---------------------------------------------------------------|---------------------|----------------|---------------------------------------|----------------------------------------|
| 0           | 978.376                             | 21.952                                                        | 54.90               | 11.79          | 10.6                                  | 21200                                  |
| 2           | 977.884                             | 22.157                                                        | 58.08               | 12.58          | 9.585                                 | 30200                                  |
| 3           | 984.247                             | 22.396                                                        | 60.66               | 13.37          | 9.09                                  | 23200                                  |
| 4           | 984.398                             | 21.703                                                        | 59.65               | 12.74          | 9.315                                 | 28500                                  |
| 6           | 986.650                             | 21.437                                                        | 62.35               | 13.19          | 7.695                                 | 25700                                  |
| 8           | 982.346                             | 21.218                                                        | 60.57               | 12.62          | 9.045                                 | 33100                                  |
| 10          | 967.403                             | 21.153                                                        | 53.93               | 11.04          | 12.06                                 | 19900                                  |
| 12          | 977.186                             | 20.798                                                        | 56.50               | 11.48          | 10.665                                | 28400                                  |
| 13          | 984.446                             | 20.833                                                        | 55.35               | 11.35          | 11.34                                 | 22300                                  |
| 14          | 990.760                             | 20.414                                                        | 56.18               | 11.36          | 10.8                                  | 13700                                  |
| 16          | 991.085                             | 19.914                                                        | 51.58               | 10.18          | 14.31                                 | 18500                                  |
| 19          | 991.420                             | 18.043                                                        | 53.27               | 9.53           | 13.365                                | 9620                                   |
| 21          | 994.785                             | 16.699                                                        | 50.74               | 8.43           | 16.74                                 | 9360                                   |
| 24          | 972.980                             | 14.588                                                        | 48.48               | 6.88           | 20.34                                 | 8780                                   |
| 25          | 989.400                             | 10.951                                                        | 51.88               | 5.62           | 20.21                                 | 9610                                   |
| 27          | 983.275                             | 10.377                                                        | 45.36               | 4.63           | 35.96                                 | 9680                                   |
| 30          | 982.352                             | 9.509                                                         | 44.88               | 4.19           | 40.95                                 | 11900                                  |

**Table S13:** Day wise PCE,  $J_{SC}$ ,  $V_{OC}$  and FF values of  $MA_{0.6}FA_{0.4}PbI_3/AZO$  devices stored in a  $N_2$  filled glovebox for 30 days

| No. of Days | Open Circuit Voltage, $V_{OC}$ (mV) | Short Circuit Current Density, $J_{SC}$ (mA/cm <sup>2</sup> ) | Fill Factor, FF (%) | Efficiency (%) | Series Resistance, $R_S$ ( $\Omega$ ) | Shunt Resistance $R_{Sh}$ ( $\Omega$ ) |
|-------------|-------------------------------------|---------------------------------------------------------------|---------------------|----------------|---------------------------------------|----------------------------------------|
| 0           | 991.513                             | 20.393                                                        | 66.96               | 13.54          | 8.01                                  | 27700                                  |
| 1           | 1016.040                            | 19.374                                                        | 69.80               | 13.74          | 6.30                                  | 37900                                  |
| 2           | 1009.113                            | 19.854                                                        | 69.16               | 13.86          | 7.20                                  | 44400                                  |
| 4           | 1013.220                            | 19.659                                                        | 71.56               | 14.25          | 5.76                                  | 35800                                  |
| 5           | 997.213                             | 19.852                                                        | 71.09               | 14.07          | 5.58                                  | 35700                                  |
| 7           | 991.436                             | 19.964                                                        | 71.05               | 14.06          | 4.91                                  | 32700                                  |
| 9           | 997.103                             | 19.430                                                        | 71.95               | 13.94          | 4.55                                  | 51600                                  |
| 11          | 996.940                             | 19.623                                                        | 70.52               | 13.80          | 4.68                                  | 27100                                  |
| 13          | 996.090                             | 19.754                                                        | 68.89               | 13.56          | 5.18                                  | 29200                                  |
| 16          | 993.480                             | 18.957                                                        | 65.87               | 12.41          | 6.35                                  | 42100                                  |
| 18          | 981.971                             | 19.235                                                        | 62.98               | 11.90          | 6.39                                  | 26700                                  |
| 20          | 985.576                             | 18.870                                                        | 61.96               | 11.52          | 7.02                                  | 31000                                  |
| 22          | 971.362                             | 18.755                                                        | 58.64               | 10.68          | 8.64                                  | 23700                                  |
| 24          | 960.592                             | 18.400                                                        | 57.48               | 10.16          | 8.10                                  | 16800                                  |
| 27          | 952.135                             | 17.789                                                        | 56.55               | 9.58           | 8.55                                  | 13900                                  |
| 29          | 954.644                             | 17.056                                                        | 56.56               | 9.21           | 9.23                                  | 13200                                  |
| 30          | 924.941                             | 17.527                                                        | 55.20               | 8.95           | 10.13                                 | 20100                                  |

**Table S14:** Fitted values of different parameters from Nyquist plot of the degraded (30 days)  $MA_{0.6}FA_{0.4}PbI_3/ZnO$  and  $MA_{0.6}FA_{0.4}PbI_3/AZO$  devices at 0.85V under dark

| ETL Layer          | $R_c$ ( $\Omega$ ) | $R_{Rec}$ ( $\Omega$ ) | $C_c$ (nF) | CPE-Y(nMho) | CPE-N |
|--------------------|--------------------|------------------------|------------|-------------|-------|
| Pristine ZnO       | 127                | 3050                   | 15.3       | 0.28        | 0.95  |
| Al doped ZnO (AZO) | 98                 | 5940                   | 13.5       | 1.54        | 0.96  |

**Table S15:** Flat-band potential, acceptor density and depletion layer width at zero bias of degraded (30 days)  $MA_{0.6}FA_{0.4}PbI_3/ZnO$  and  $MA_{0.6}FA_{0.4}PbI_3/AZO$  devices extracted from Mott-Schottky curve

| ETL Layer          | Dopant Density (cm <sup>-3</sup> ) | Flat-band Potential (V) | Depletion Layer Width (nm) |
|--------------------|------------------------------------|-------------------------|----------------------------|
| Pristine ZnO       | $4.17 \times 10^{16}$              | 0.63                    | 188.29                     |
| Al doped ZnO (AZO) | $6.63 \times 10^{16}$              | 0.96                    | 172.37                     |



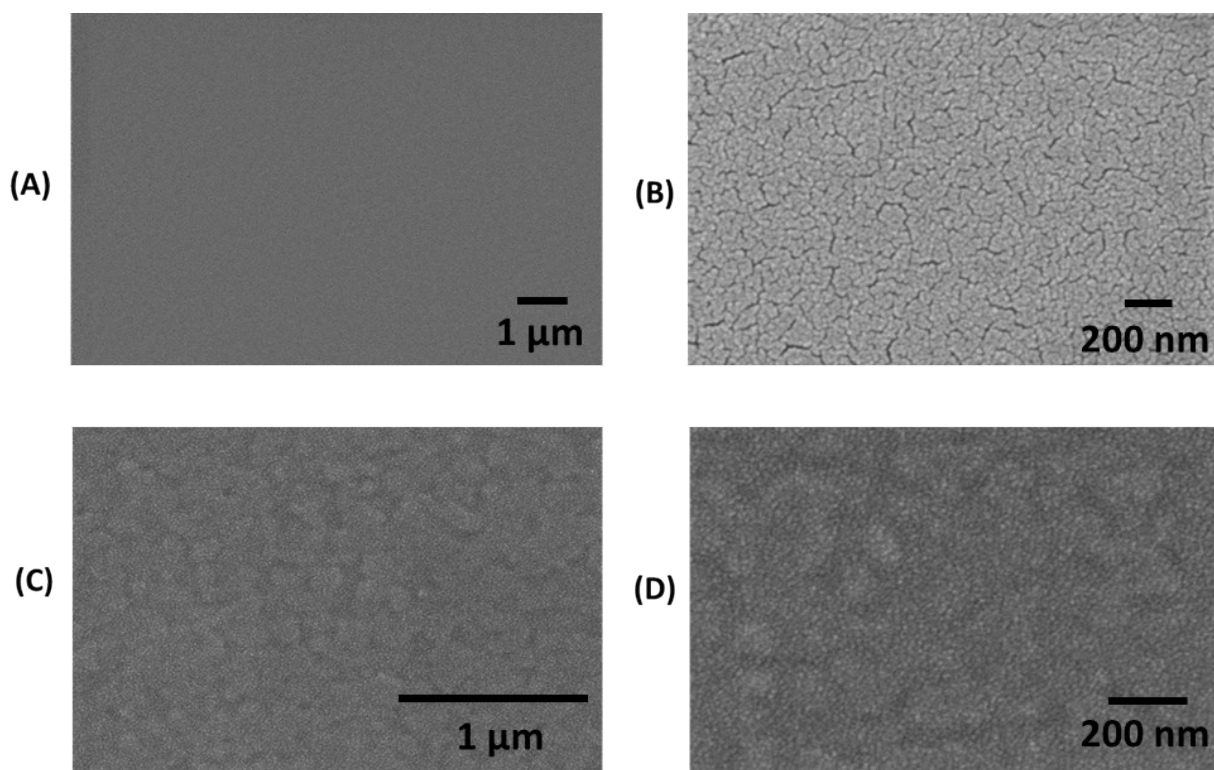

**Fig. S1** Top view Scanning Electron Microscopy (SEM) images of (A)-(B) ZnO film and (C)-(D) AZO film on top of ITO/glass substrate

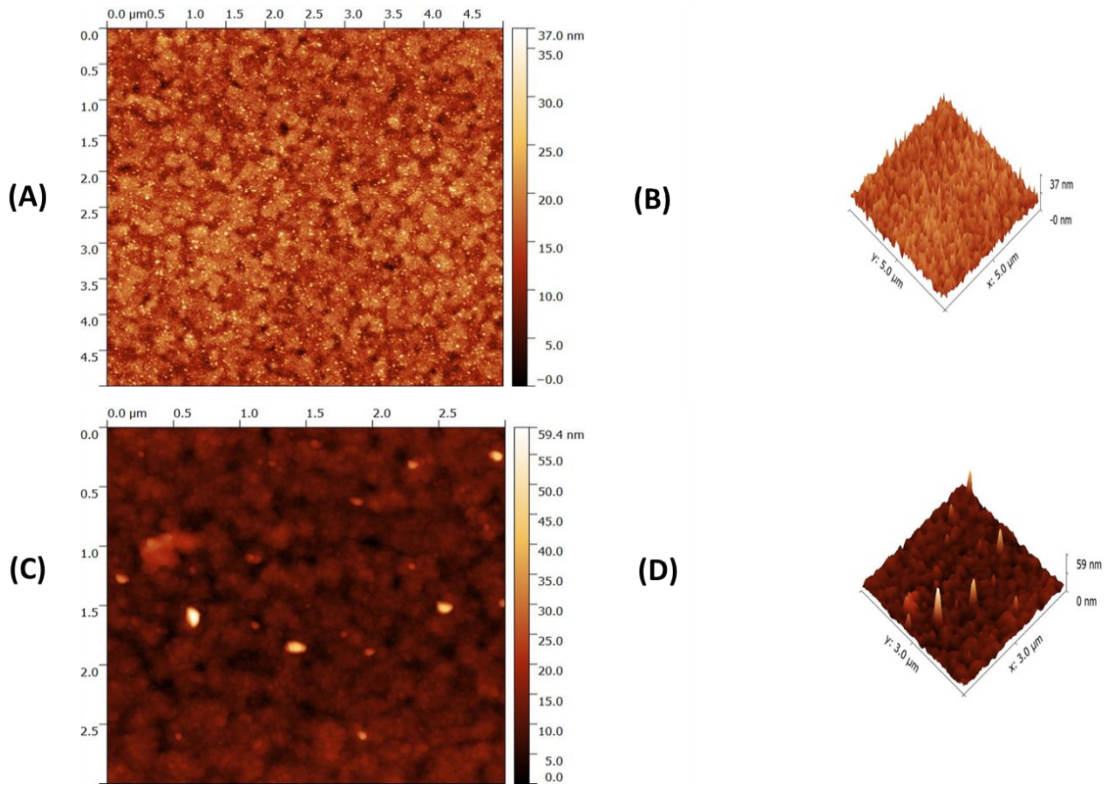

**Fig. S2** Two and Three dimensional Atomic Force Microscopy (AFM) images (A)-(B) ZnO film and (C)-(D) AZO film on top of ITO/glass substrate

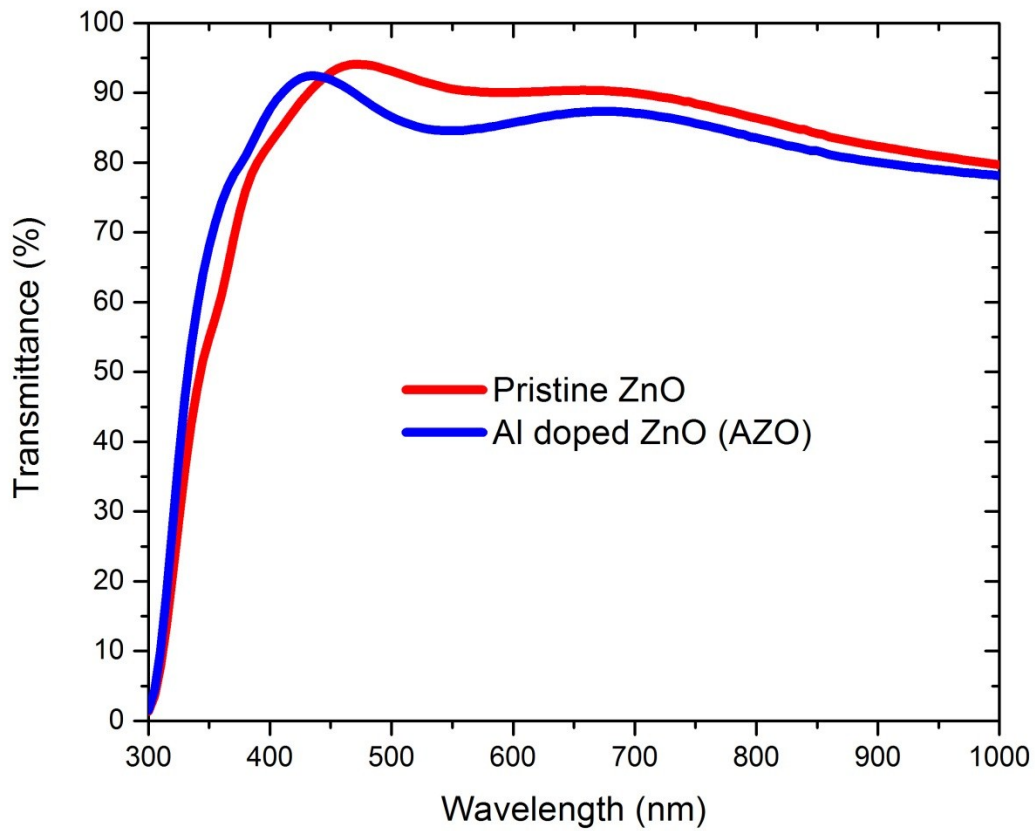

**Fig. S3** Transmittance pattern of low temperature processed pristine ZnO and AZO ETL films on ITO/glass substrate

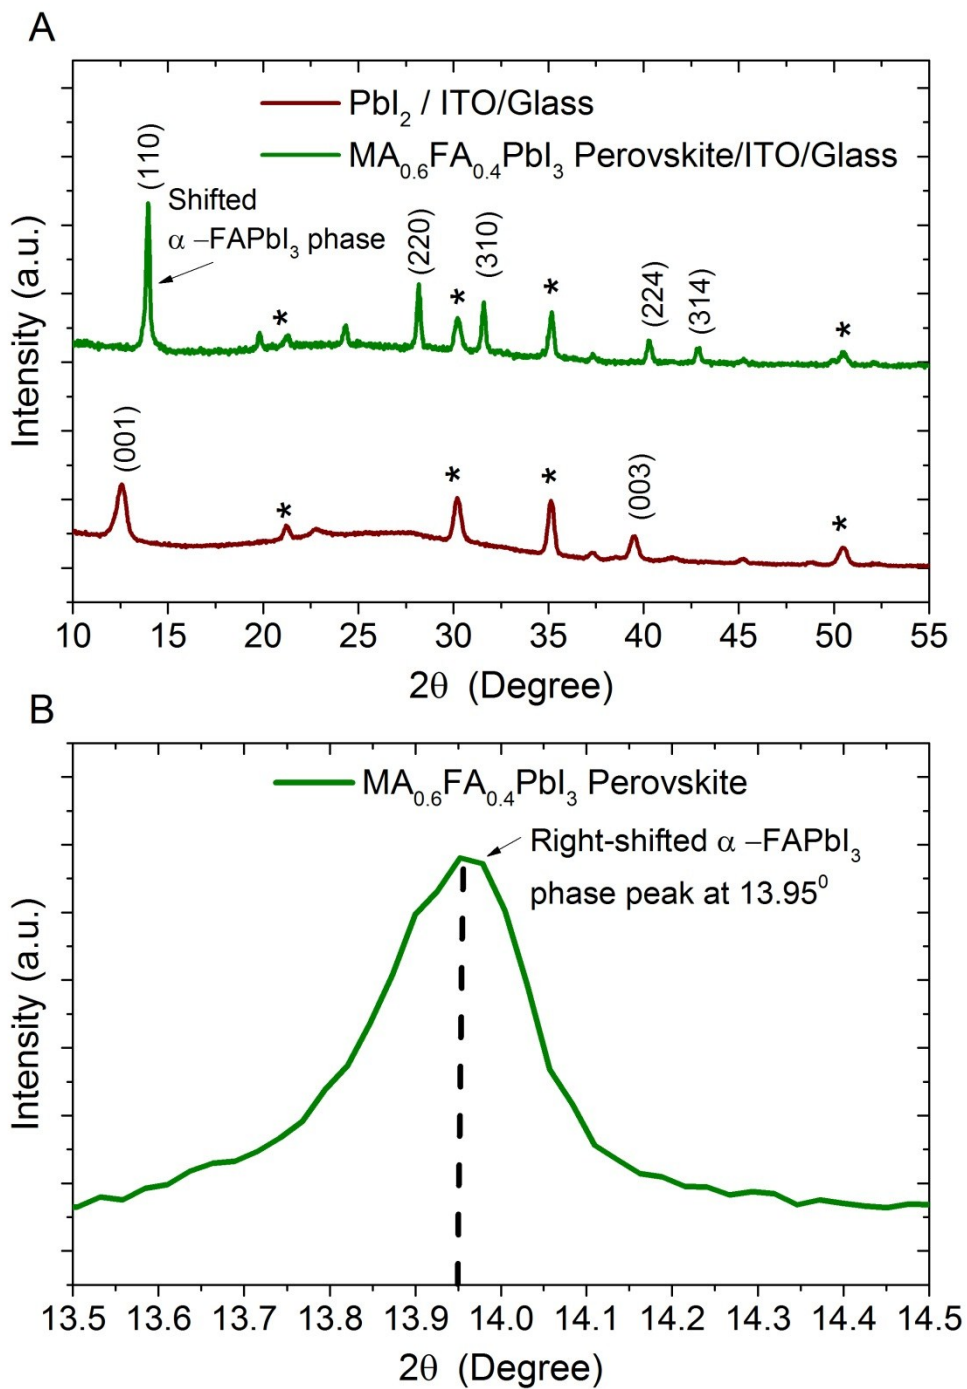

**Fig. S4** (A) XRD patterns of  $\text{PbI}_2$  and  $\text{MA}_{0.6}\text{FA}_{0.4}\text{PbI}_3$  perovskite showing the major diffraction peaks and the corresponding crystal orientation (B) Enlarged view of the XRD pattern of  $\text{MA}_{0.6}\text{FA}_{0.4}\text{PbI}_3$  lifting up the  $0.15^\circ$  right-shift in  $\text{MA}_{0.6}\text{FA}_{0.4}\text{PbI}_3$  perovskite peak with regards to pristine  $\text{FAPbI}_3$   $\alpha$ -phase peak at  $13.80^\circ$  (The \* signs denote the peaks for ITO)

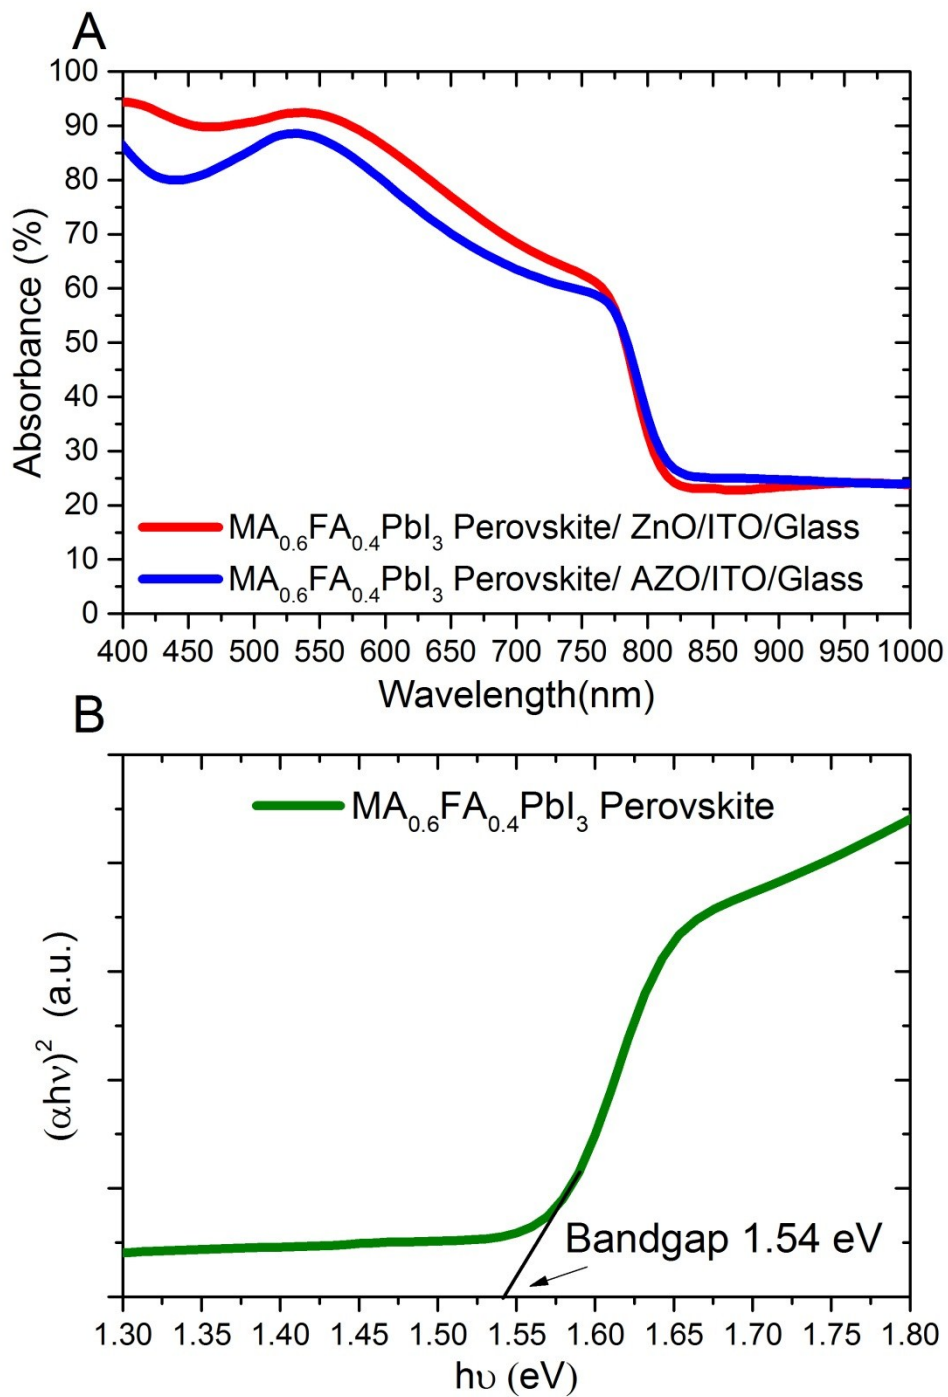

**Fig. S5** (A) Absorption curves of MA<sub>0.6</sub>FA<sub>0.4</sub>PbI<sub>3</sub>/ZnO and MA<sub>0.6</sub>FA<sub>0.4</sub>PbI<sub>3</sub>/AZO films on top of ITO/glass substrate (B) Estimation of approximate material bandgap of MA<sub>0.6</sub>FA<sub>0.4</sub>PbI<sub>3</sub> perovskite film using Tauc plot

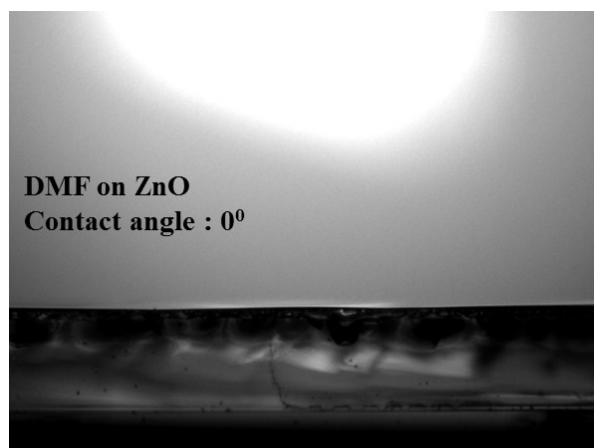

(A)

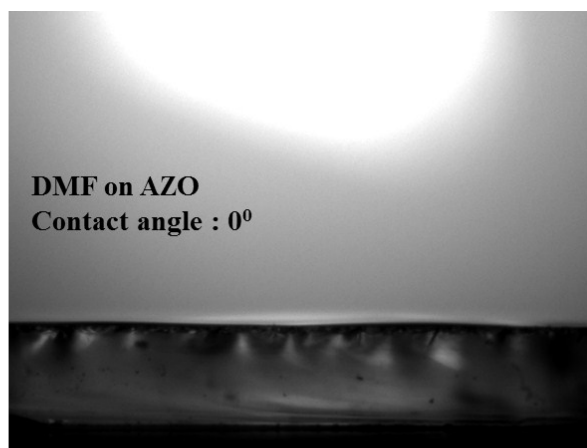

(B)

**Fig. S6** Contact angle measurement with DMF solution ( $\text{PbI}_2$  precursor) on (A) pristine ZnO and (B) Al doped ZnO (AZO) film. Both the contact angles were essentially  $\sim 0^{\circ}$  indicating that the surface wettability of ETL films (ZnO or AZO film) does not substantially contribute to the variation in surface morphology of overlying perovskite layer

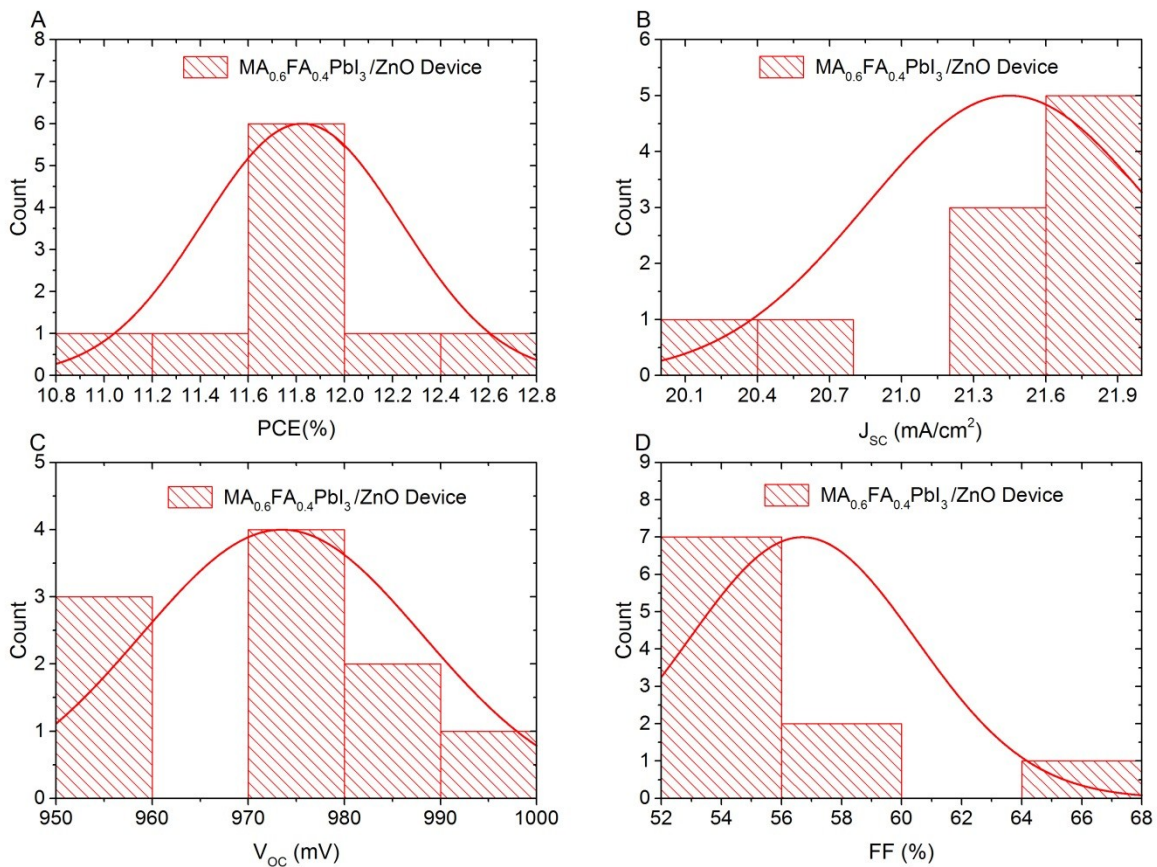

**Fig. S7** Statistical histogram (showing normal distribution) of (A) PCE, (B)  $J_{\text{sc}}$ , (C)  $V_{\text{oc}}$  and (D) FF obtained from 10 identically fabricated ITO/solgel ZnO/  $\text{MA}_{0.6}\text{FA}_{0.4}\text{PbI}_3$  perovskite/Spiro-OMeTAD/Ag devices in a single batch

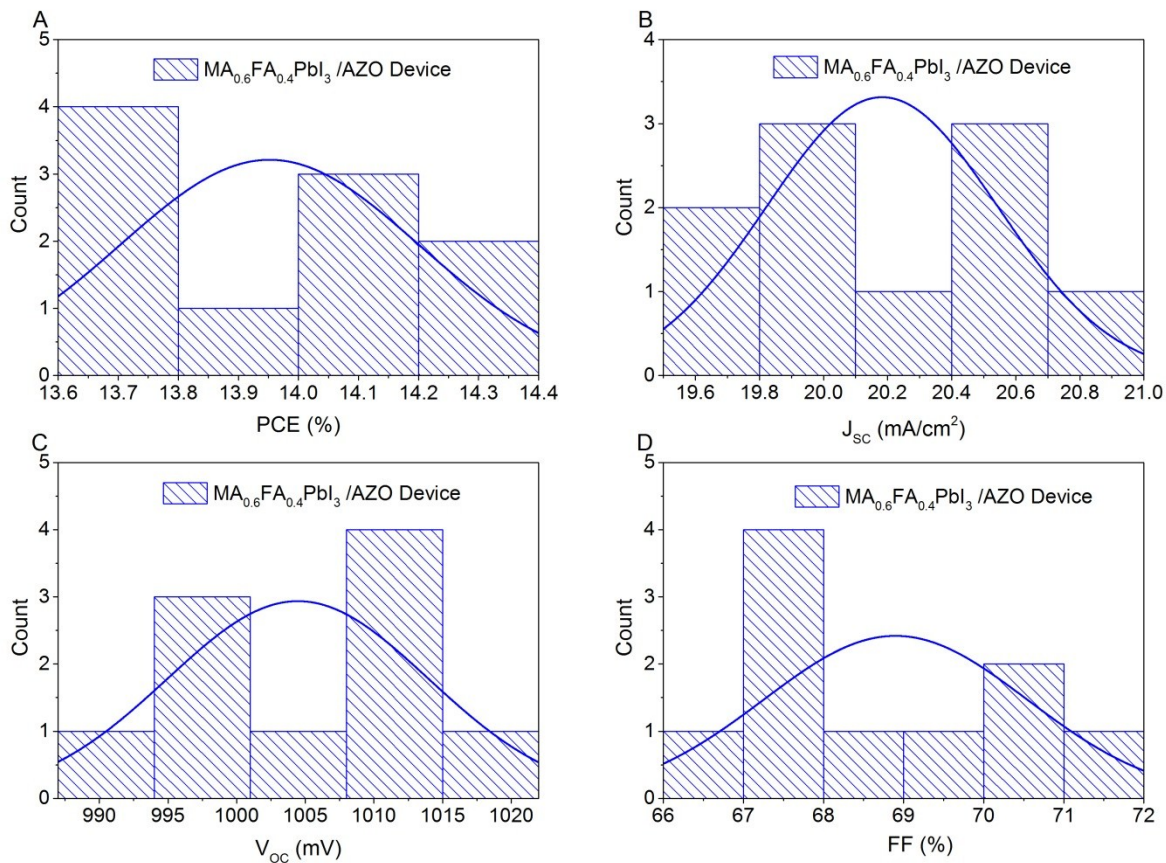

**Fig. S8** Statistical histogram (showing normal distribution) of (A) PCE, (B)  $J_{sc}$ , (C)  $V_{oc}$  and (D) FF obtained from 10 identically fabricated ITO/AZO/ MA<sub>0.6</sub>FA<sub>0.4</sub>PbI<sub>3</sub> perovskite/Spiro-OMeTAD/Ag device in a single batch



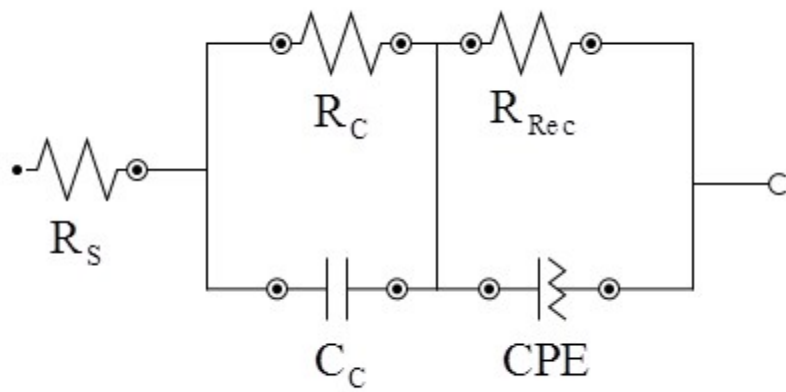

**Fig. S9** Equivalent circuit model used to fit the experimental data from Nyquist plot

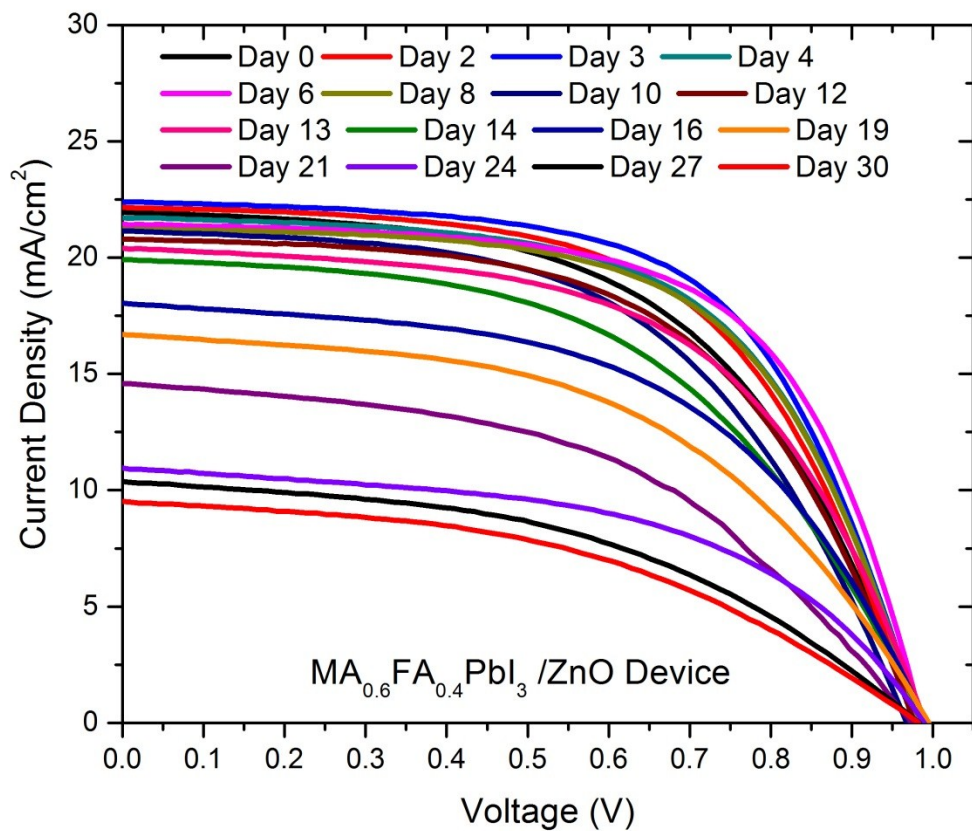

**Fig. S10** IV curves of MA<sub>0.6</sub>FA<sub>0.4</sub>PbI<sub>3</sub>/ZnO devices throughout the time period of degradation study (30 days) with certain intervals

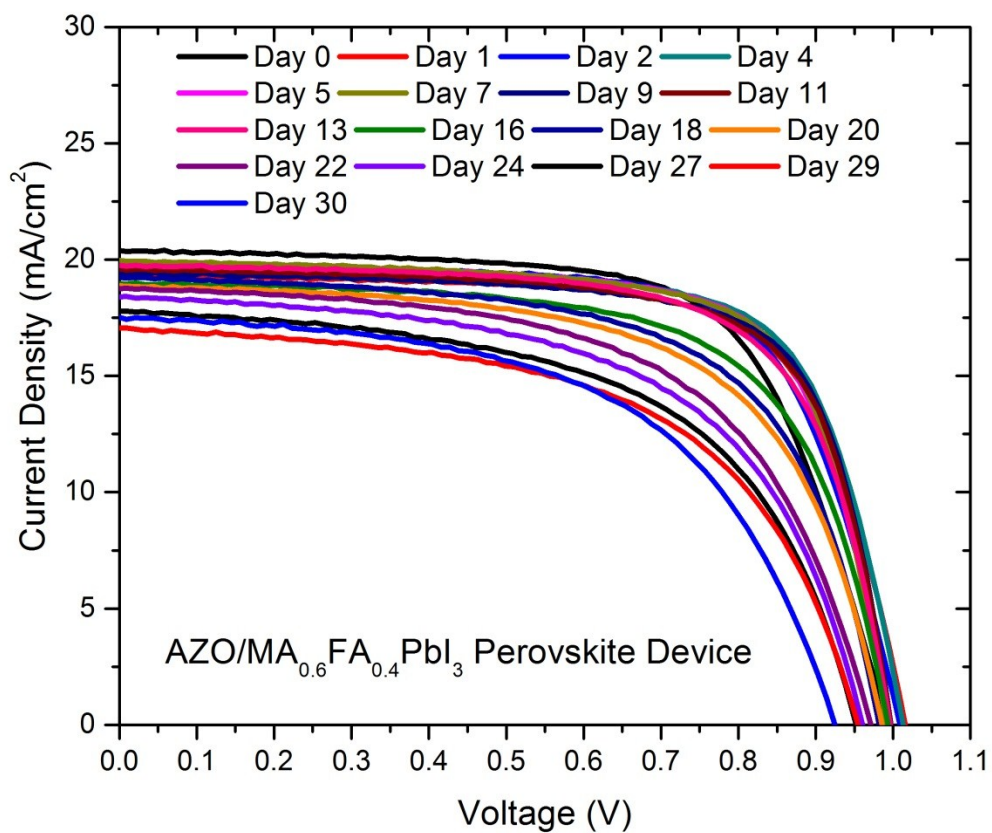

**Fig. S11** IV curves of MA<sub>0.6</sub>FA<sub>0.4</sub>PbI<sub>3</sub>/AZO devices throughout the time period of degradation study (30 days) with certain intervals

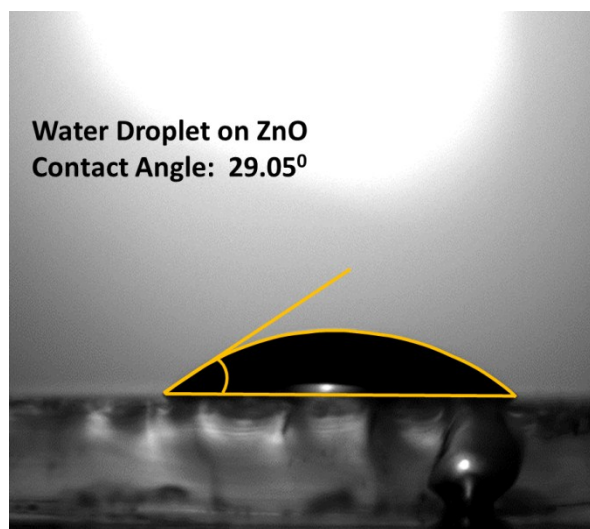

(A)

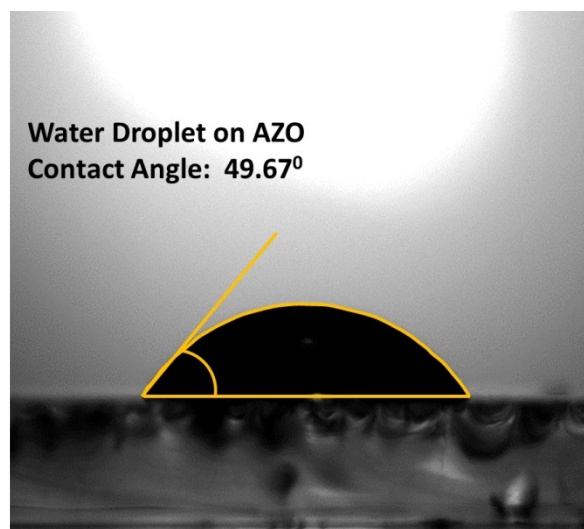

(B)

**Fig. S12** Contact angle measurement with water droplet on (A) pristine ZnO and (B) Al doped ZnO (AZO) film. The contact angle of water on pristine ZnO and AZO film are 29.05° and 49.67° respectively, indicating AZO film is less hydrophilic or more hydrophobic

**References:**

- [1] G. Garcia-Belmonte, A. Munar, E.M. Barea, J. Bisquert, I. Ugarte, R. Pacios, *Organic Electronics*, 9 (2008) 847-851.
- [2] C.M. Gore, J.O. White, E.D. Wachsman, V. Thangadurai, *Journal of Materials Chemistry A*, 2 (2014) 2363-2373.
